# Supplementary material for: Stereocontrolled synthesis of 5-azaspiro[2.3]hexane derivatives as conformationally “frozen” analogues of L-glutamic acid
Source: PubMed Central journal article supplement (PMC4077356; doi:10.3762/bjoc.10.110), 2014-05-14

**Supporting Information File 4**  
for  
**Stereocontrolled synthesis of 5-azaspiro[2.3]hexane  
derivatives as conformationally “frozen” analogues  
of L-glutamic acid**

Beatrice Bechi<sup>1,2</sup>, David Amantini<sup>3,4</sup>, Cristina Tintori<sup>1</sup>, Maurizio Botta\*<sup>1</sup> and Romano di Fabio\*<sup>3,5</sup>

Address: <sup>1</sup>Università degli Studi di Siena, Dipartimento Farmaco Chimico Tecnologico, Via A. Moro 2, 53100, Siena, Italy; <sup>2</sup>Present address: Manchester Institute of Biotechnology, School of Chemistry, University of Manchester, Oxford Road, Manchester, M13 9PL, UK, <sup>3</sup>Neurosciences Centre of Excellence for Drug Discovery, GlaxoSmithKline Medicines Research Centre, Via A. Fleming 4, 37135, Verona, Italy, <sup>4</sup>Present address: Galapagos SASU, 102 avenue Gaston Roussel, 93230 Romainville, France and <sup>5</sup>Present address: Drug Design and Discovery, Aptuit S.r.l., Via A. Fleming 4, 37135 Verona, Italy

Email: Maurizio Botta - botta.maurizio@gmail.com, Romano di Fabio - romano.difabio@aptuit.com

\* Corresponding author

**Copies of <sup>1</sup>H and <sup>13</sup>C NMR spectra of all new compounds**

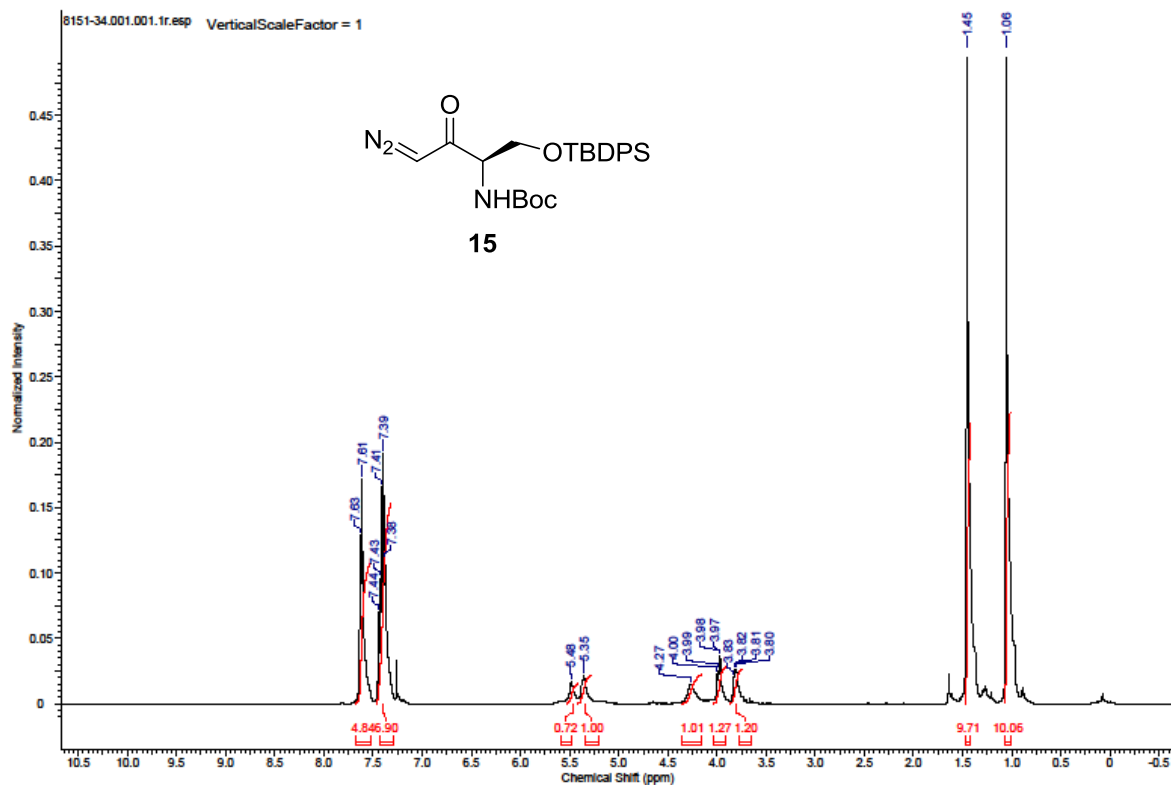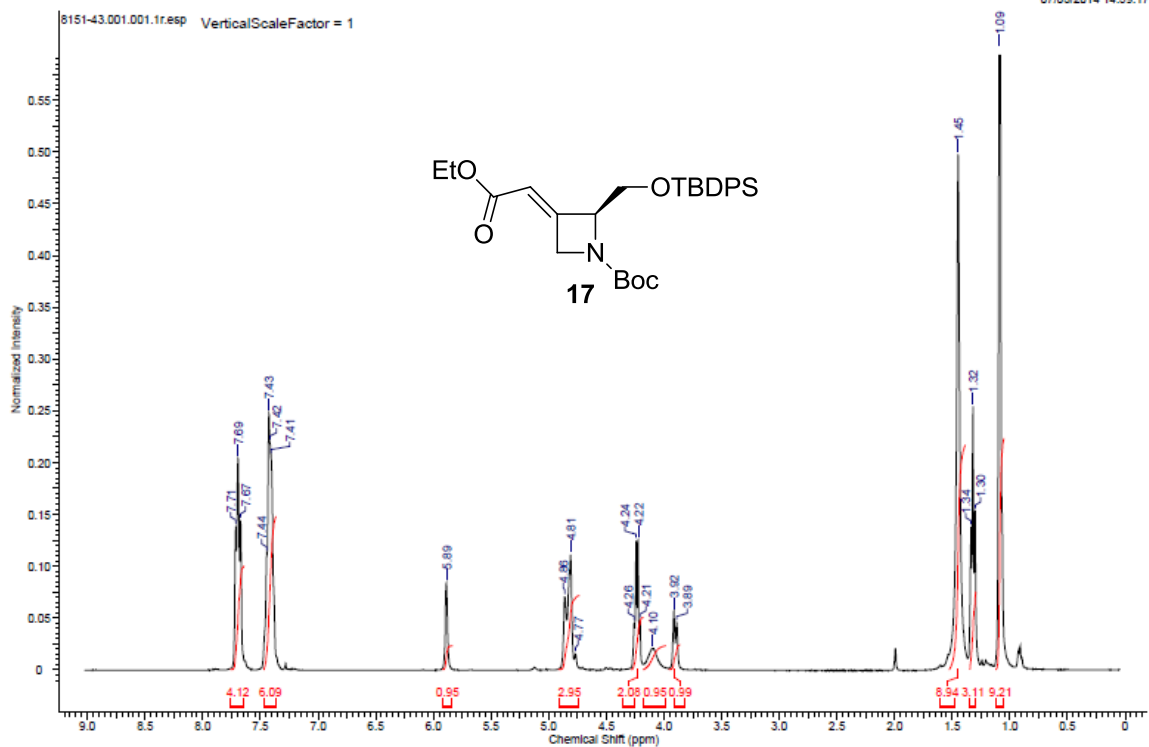

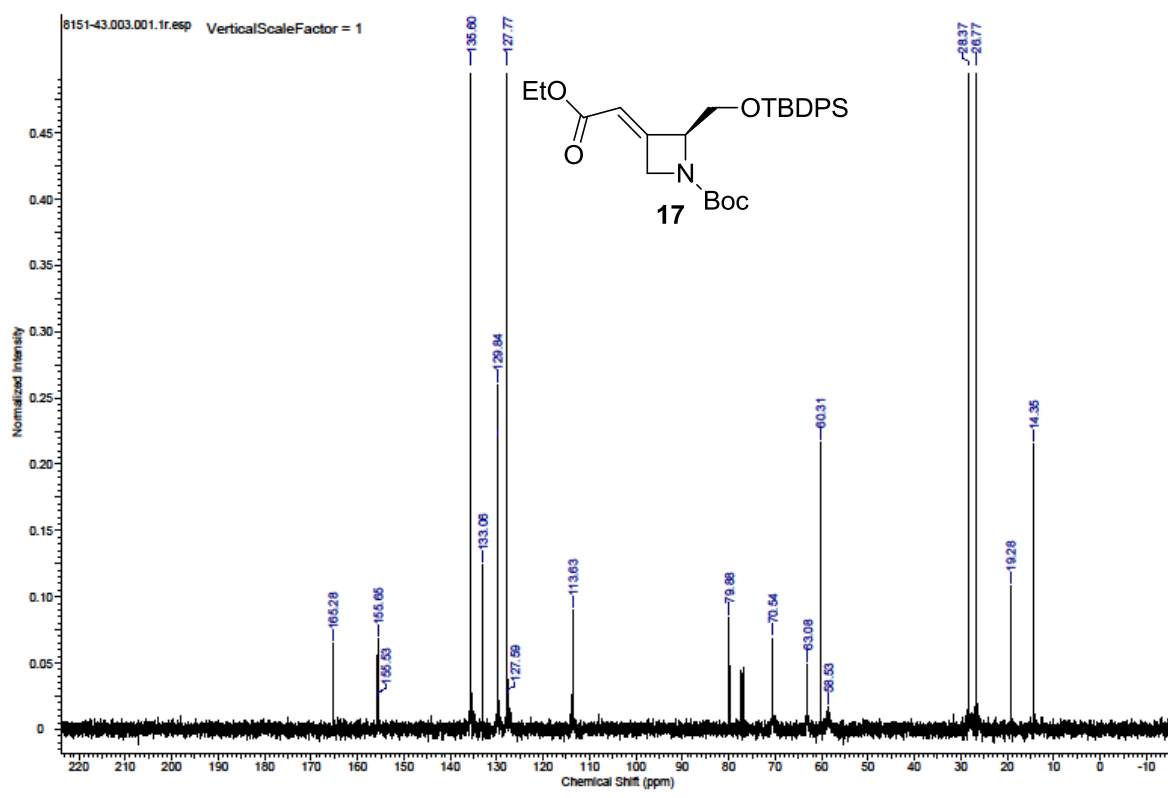

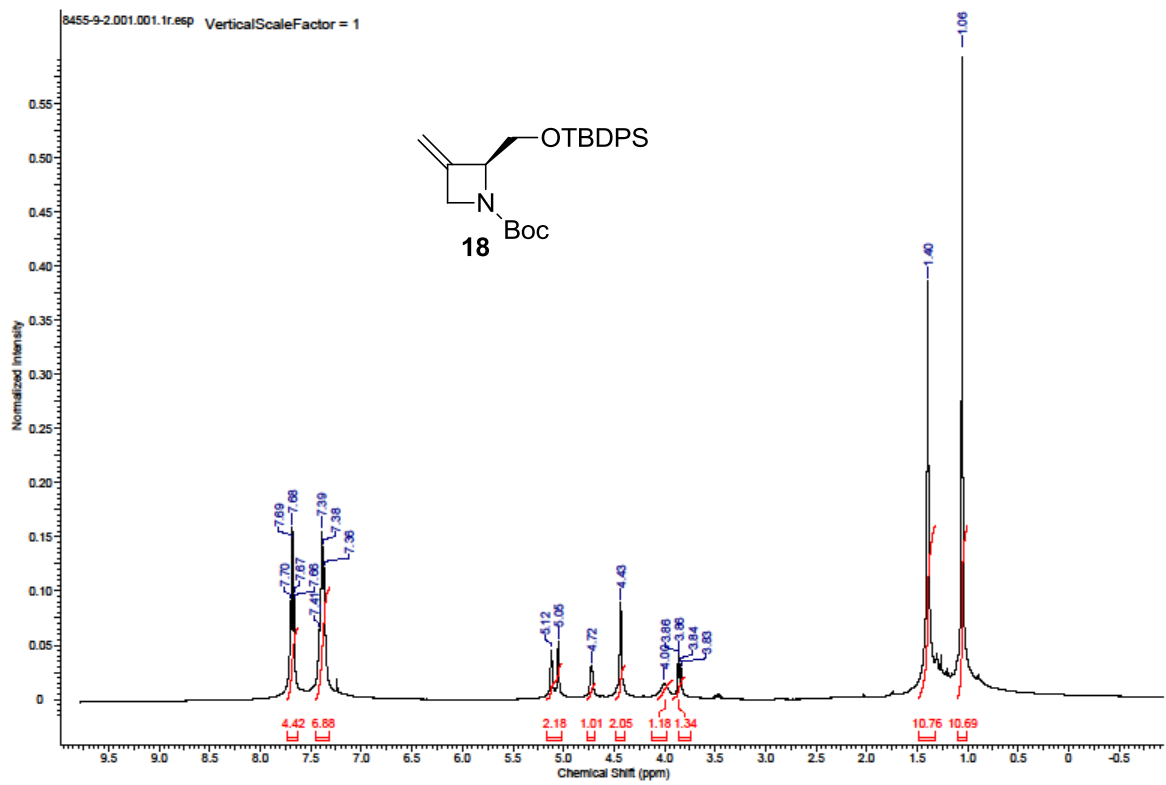

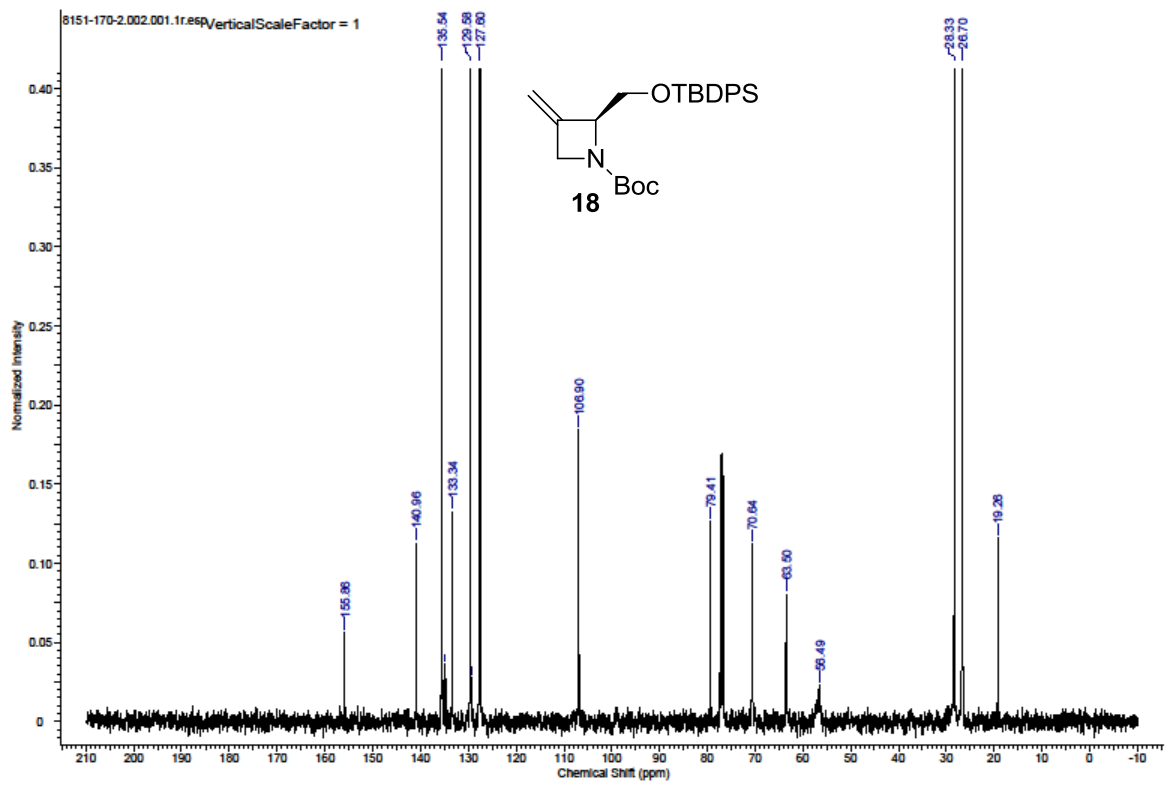

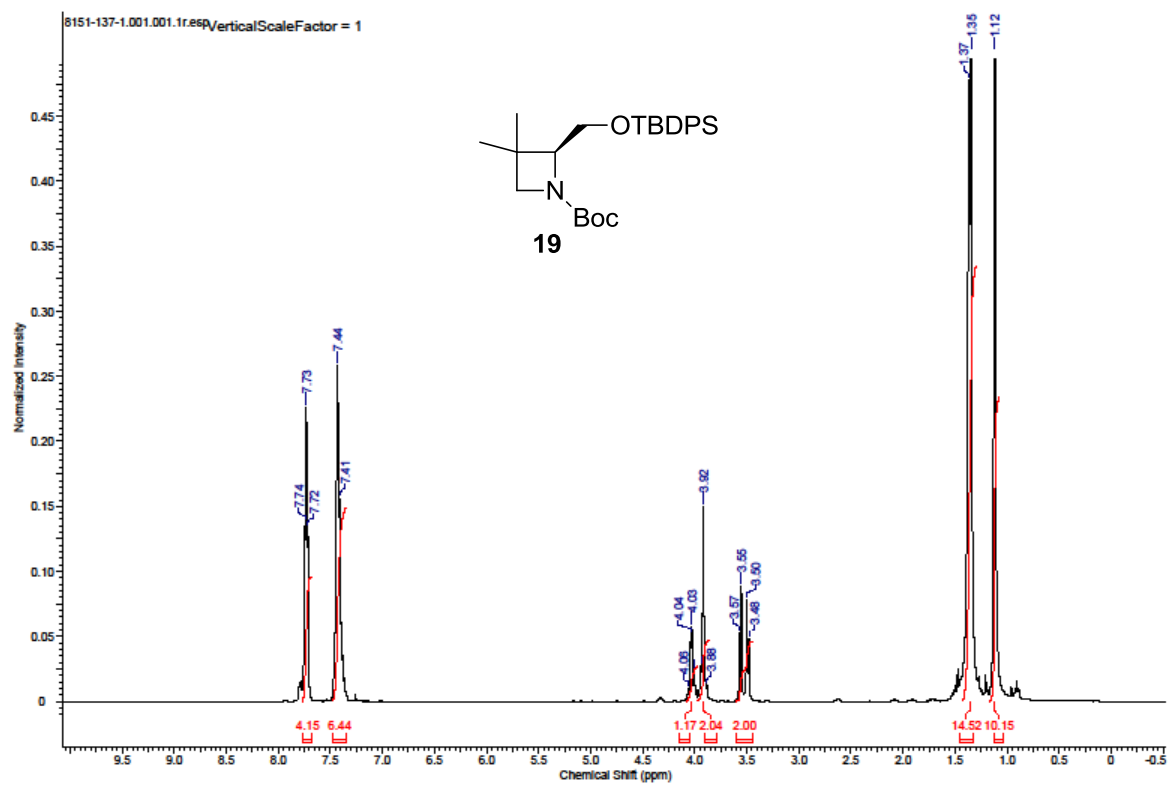

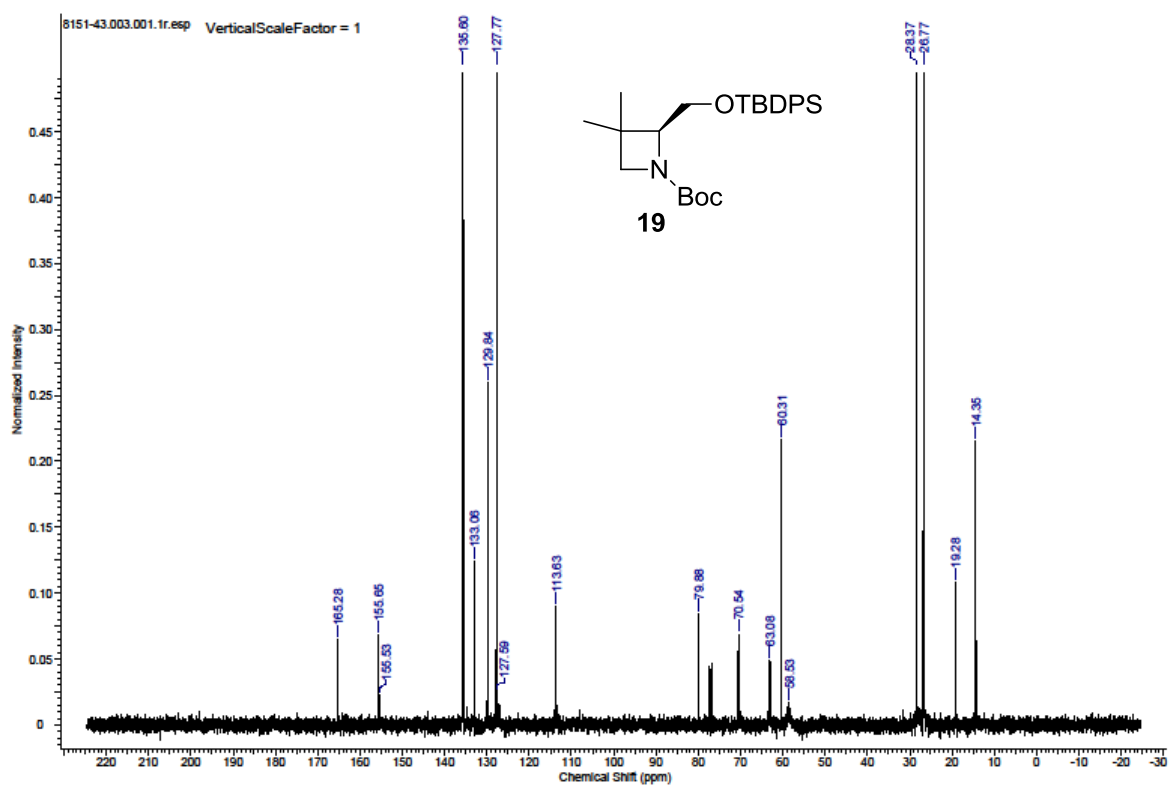

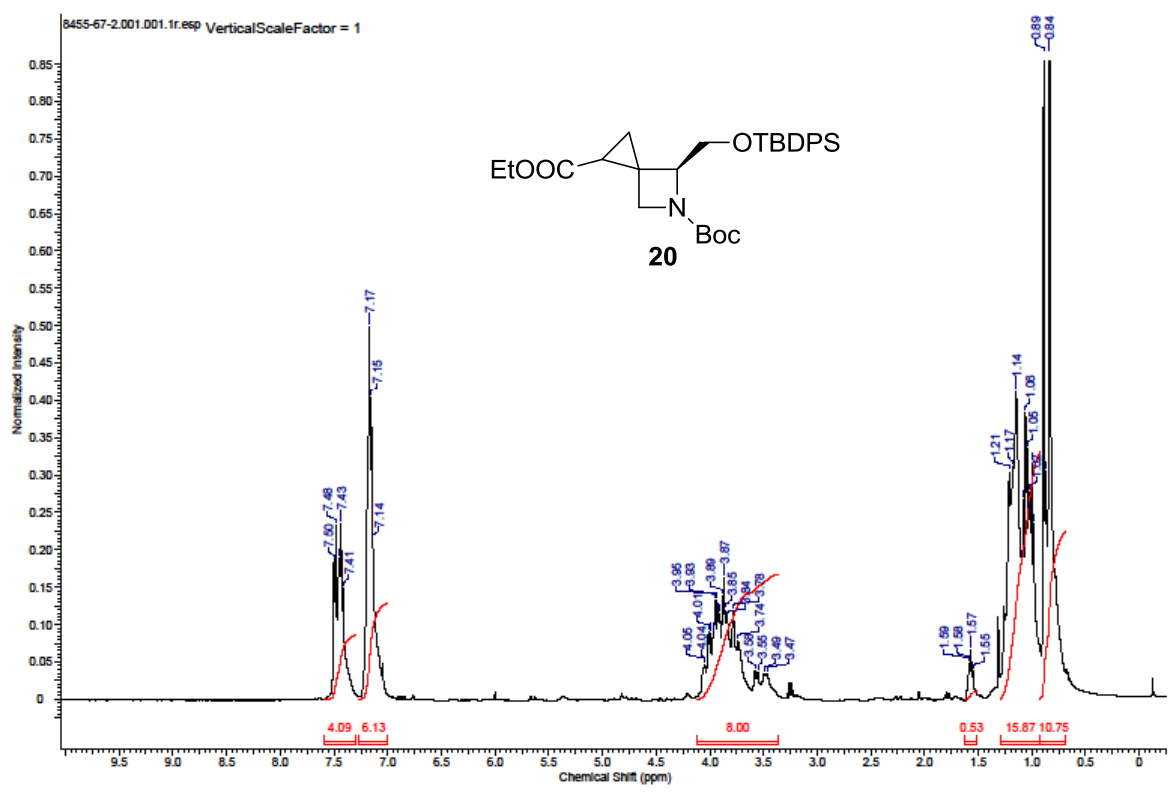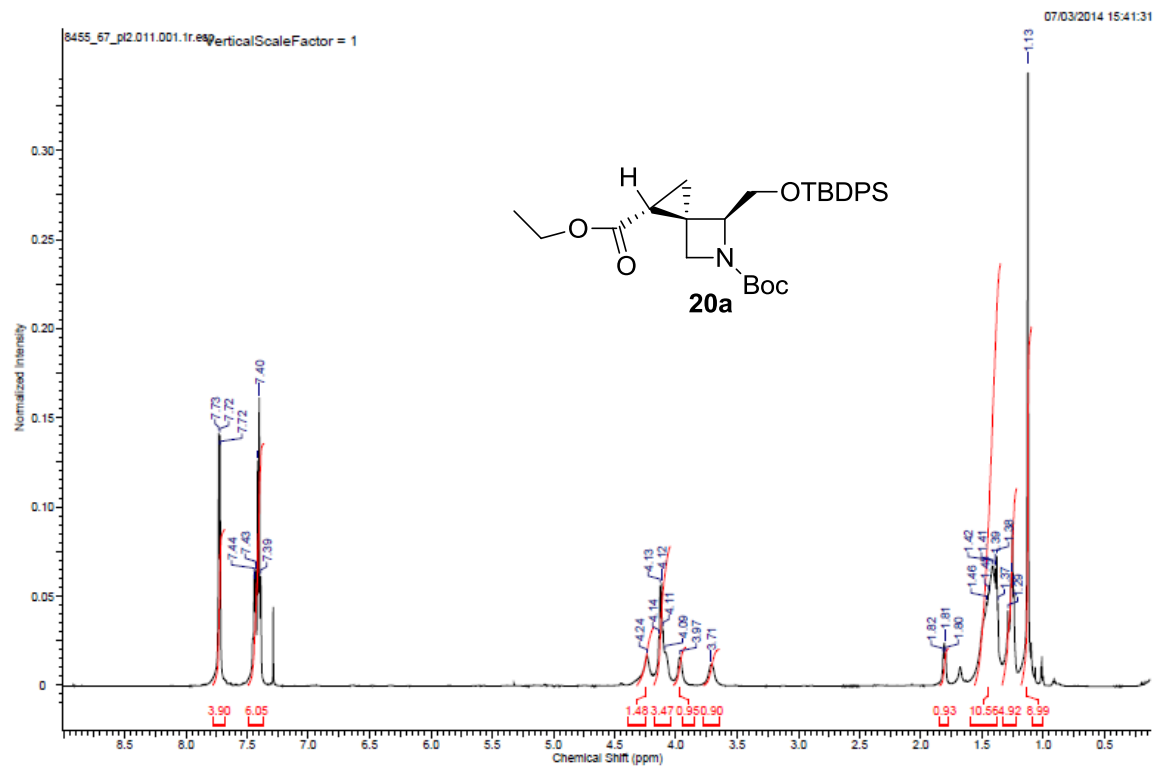



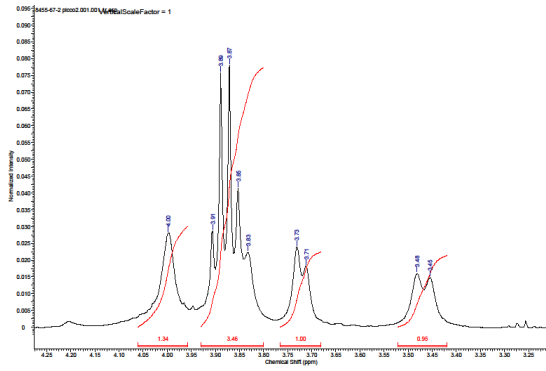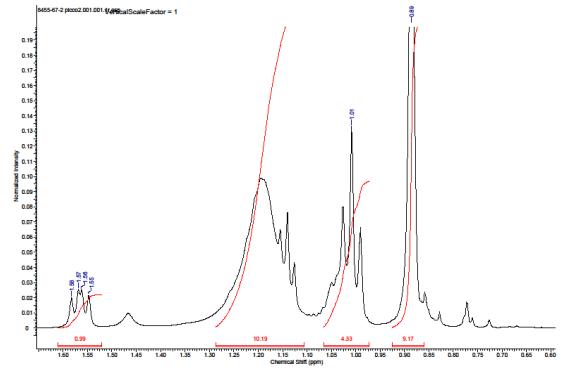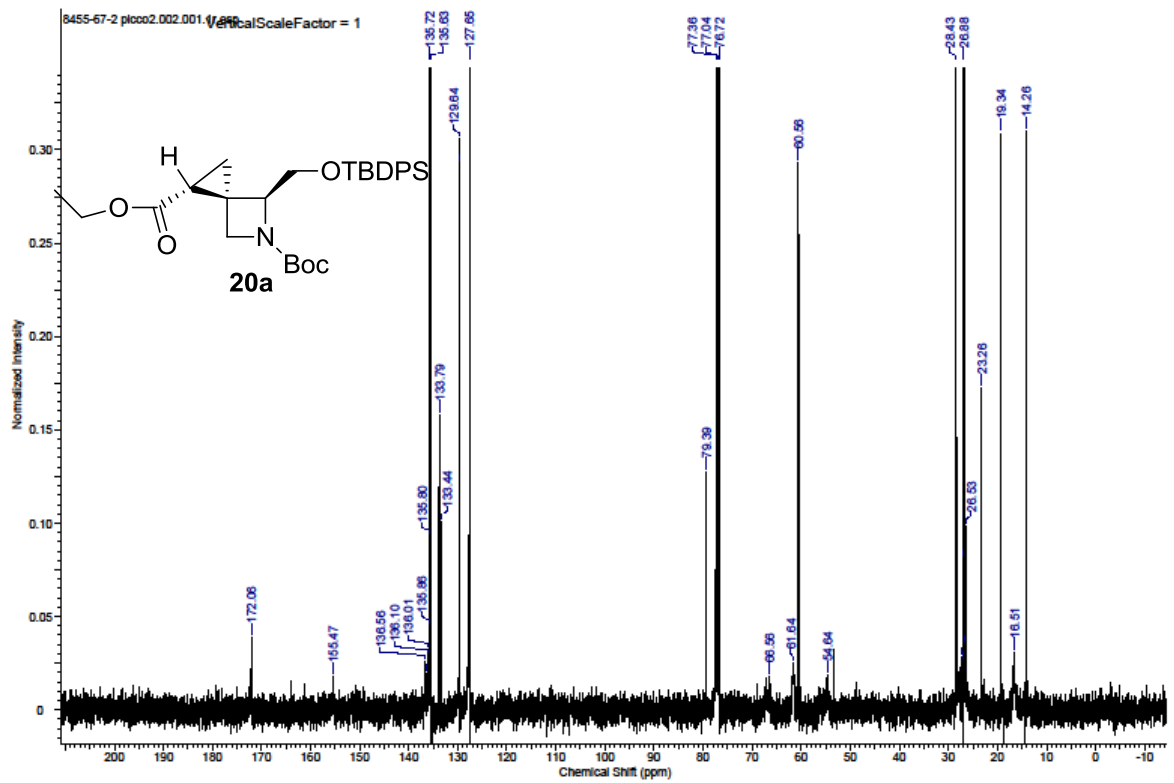

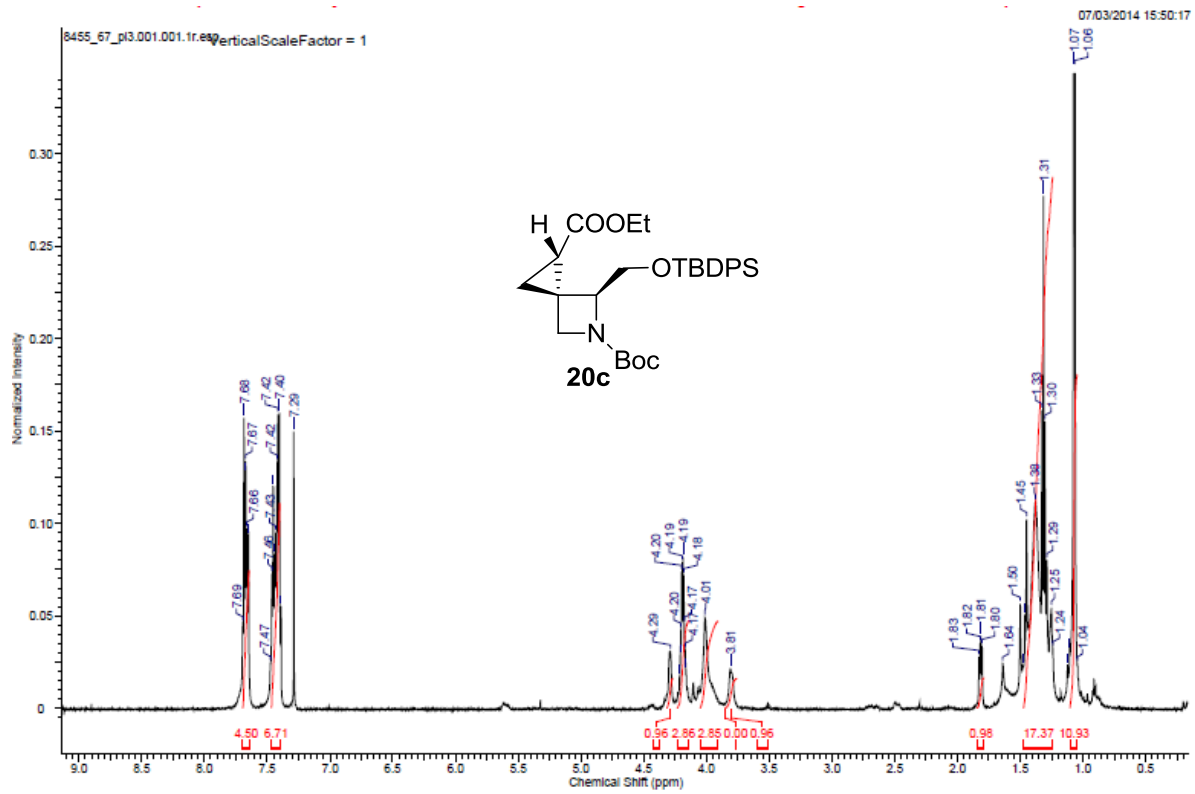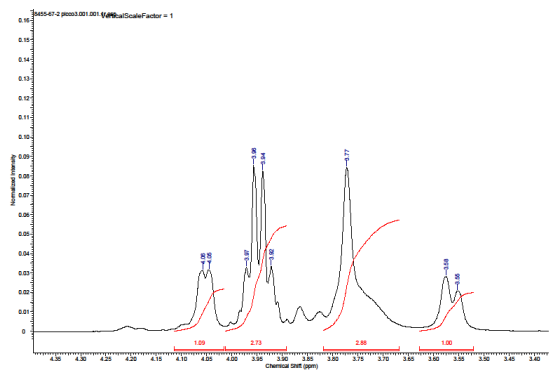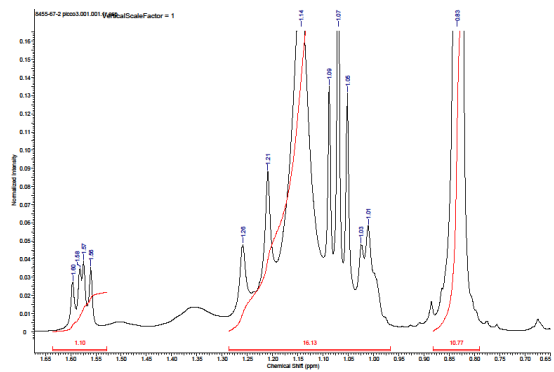

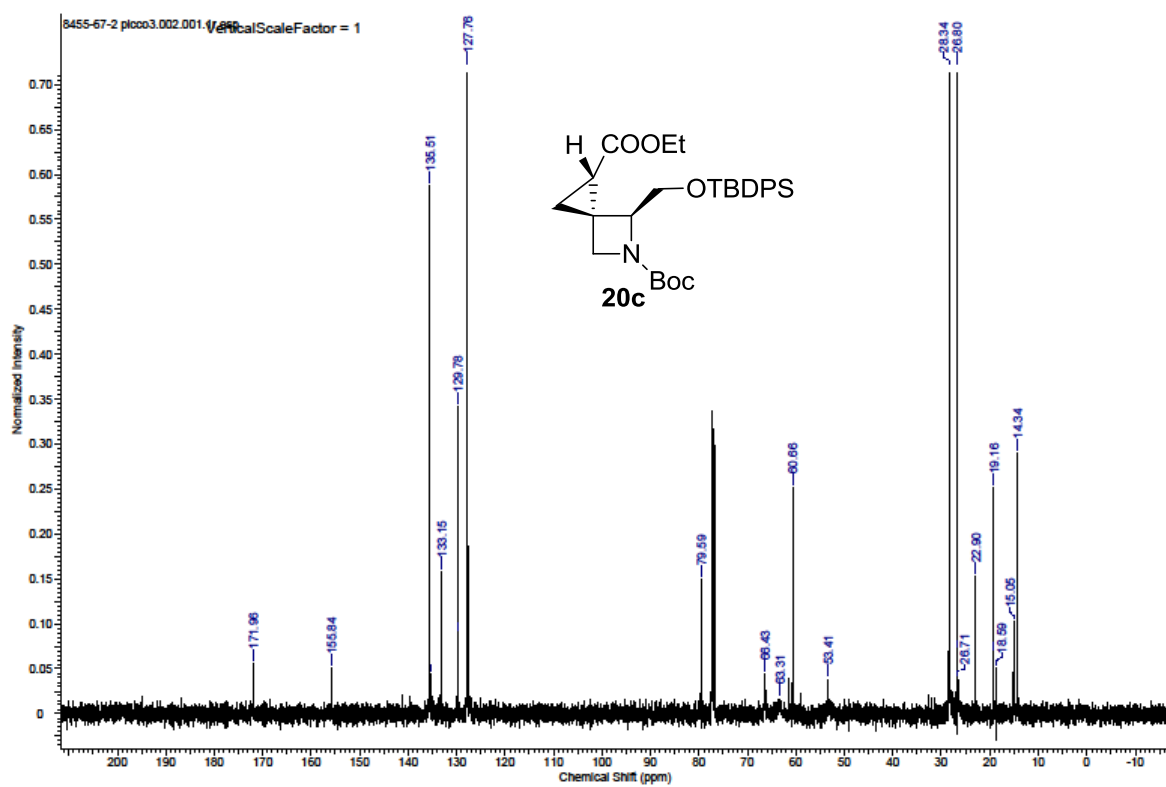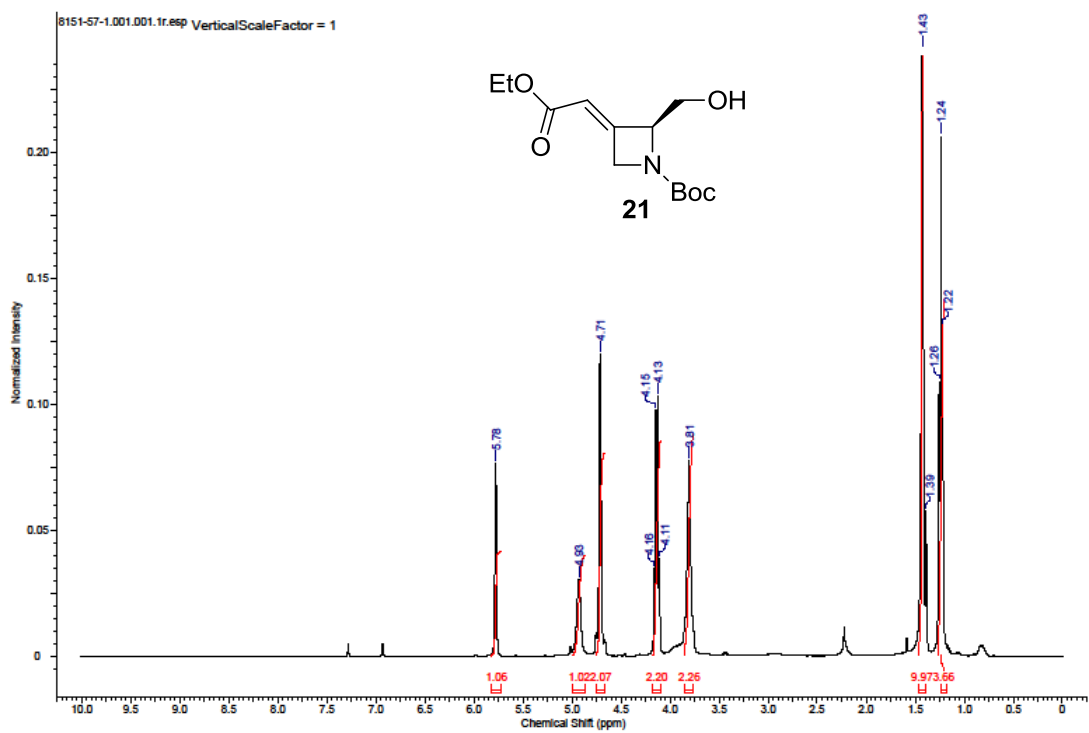

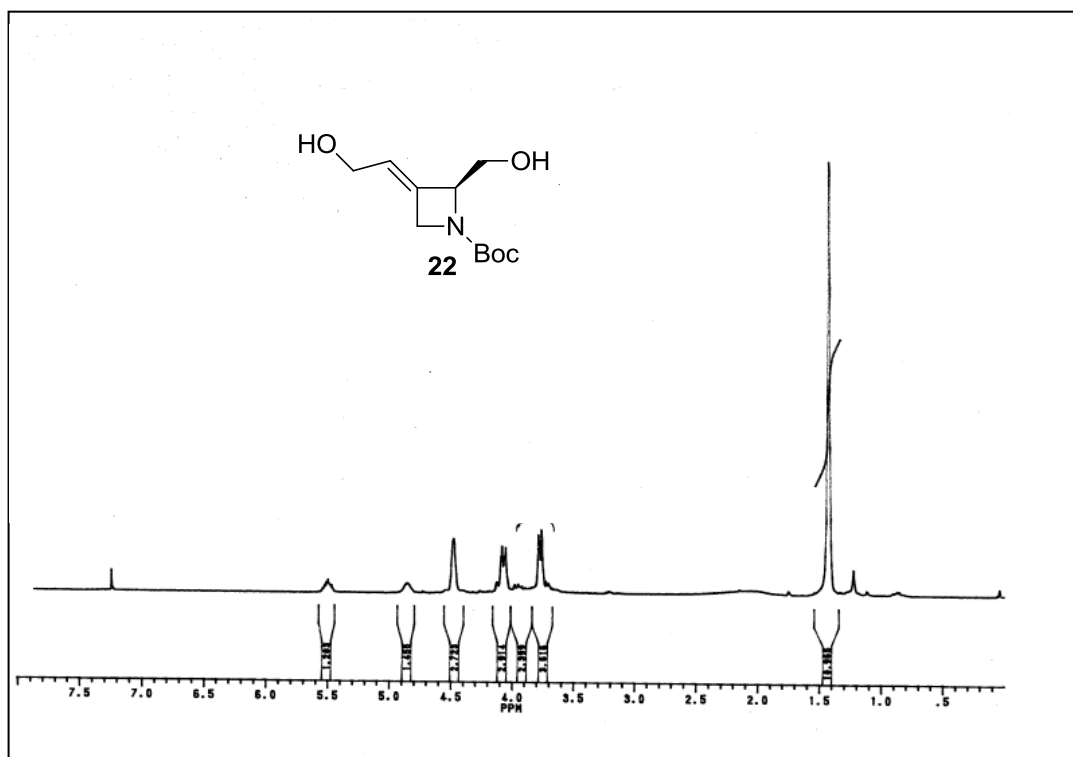

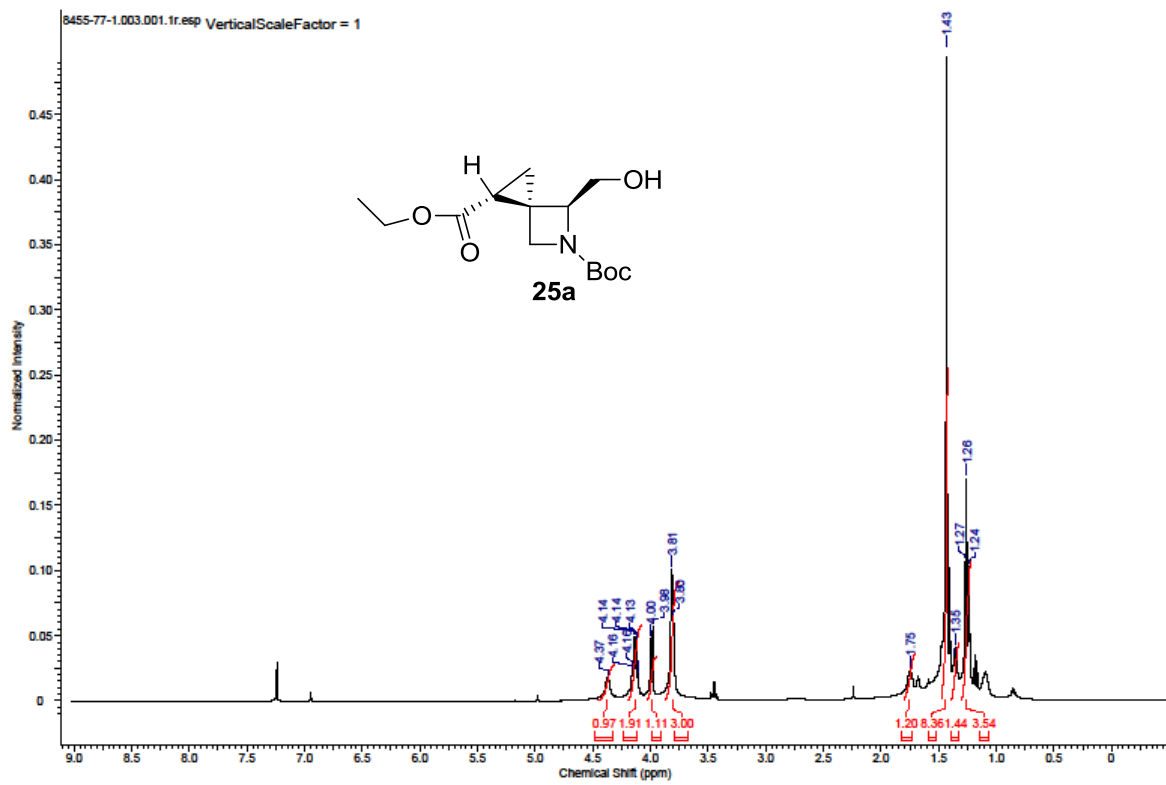

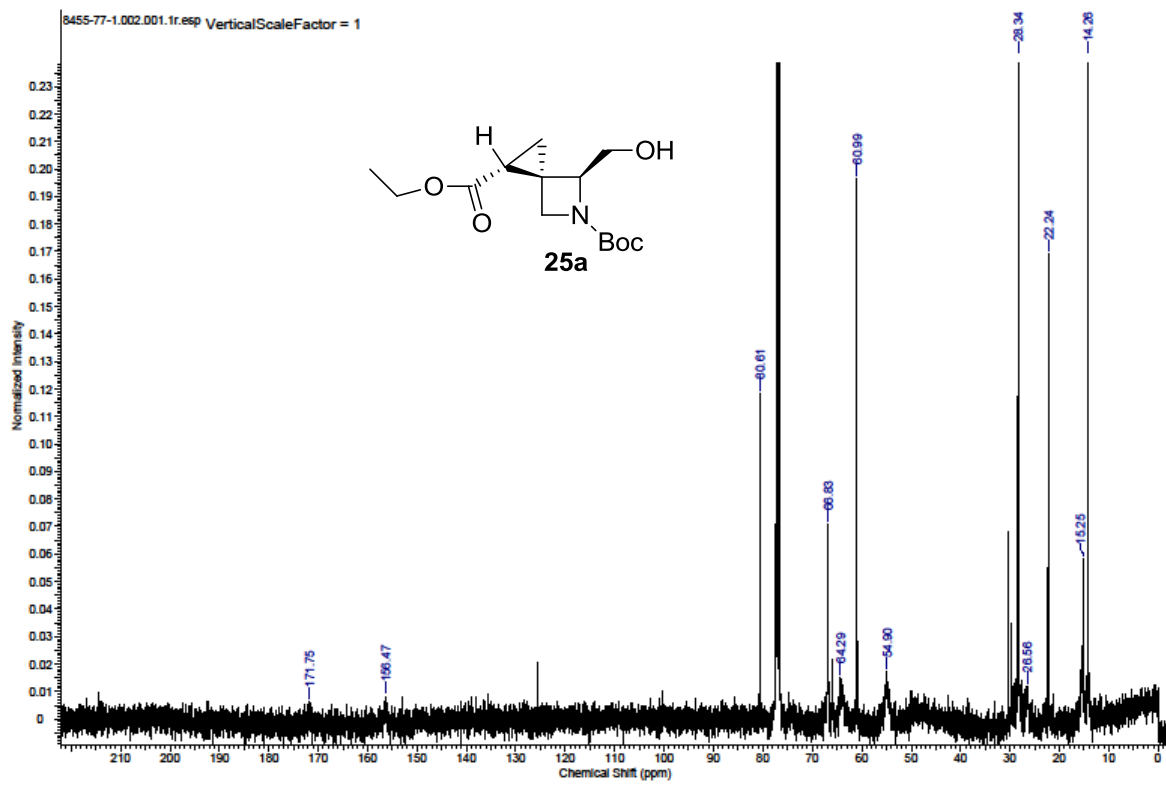

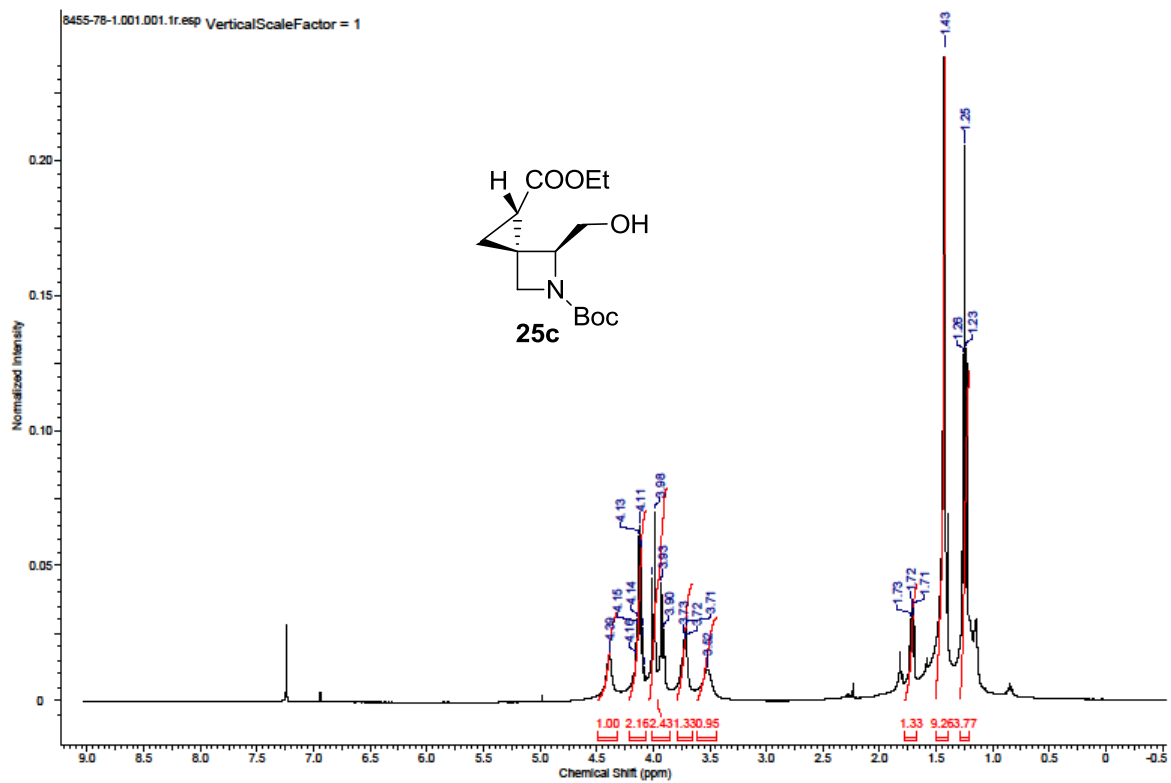

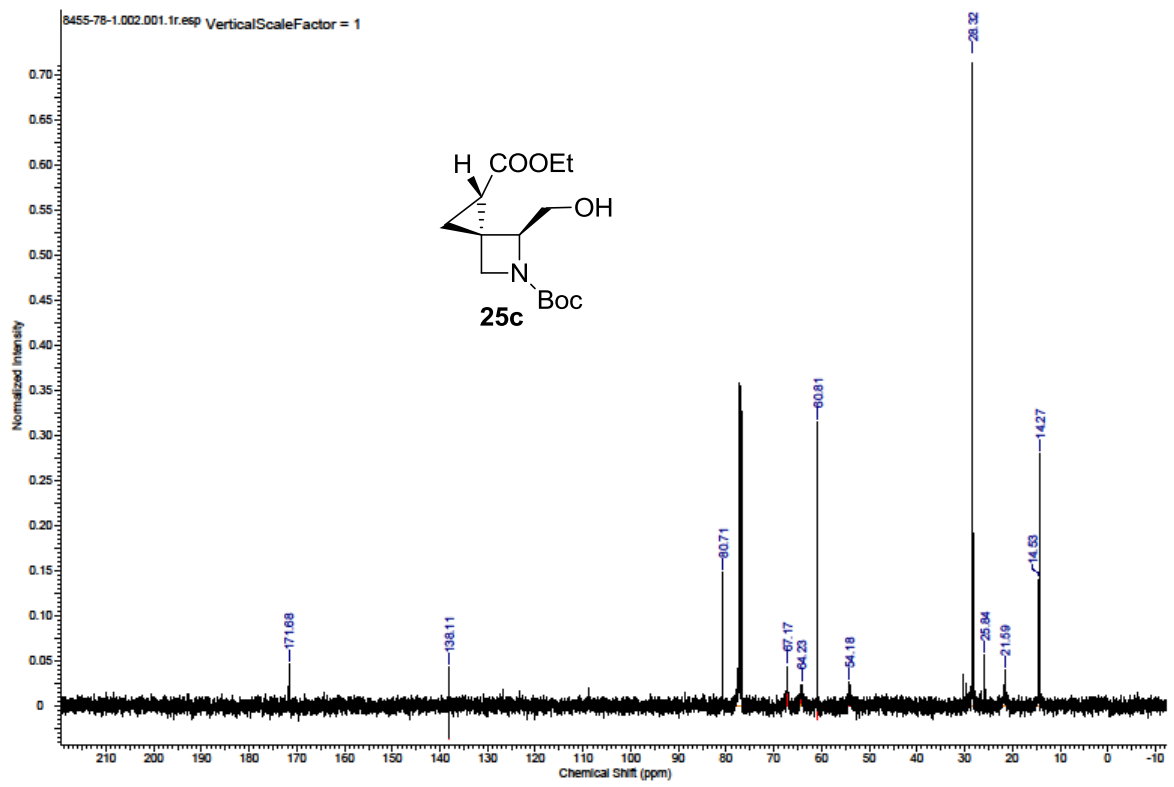



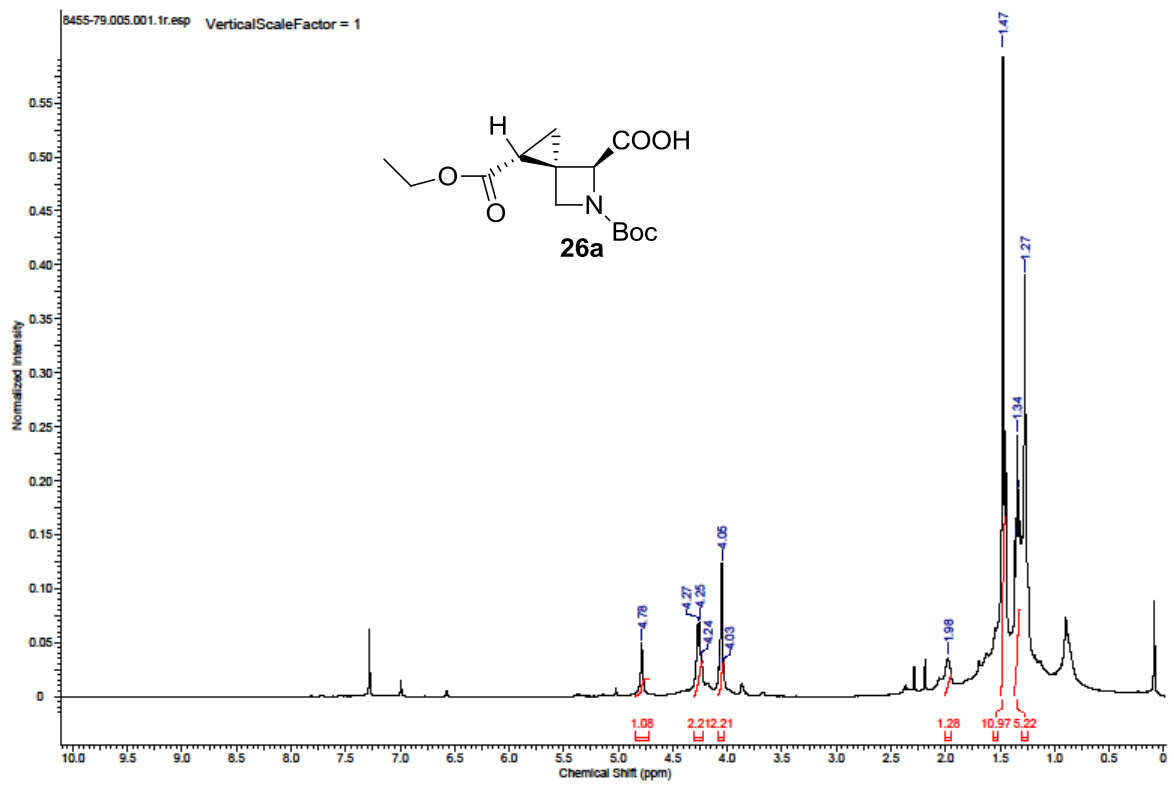

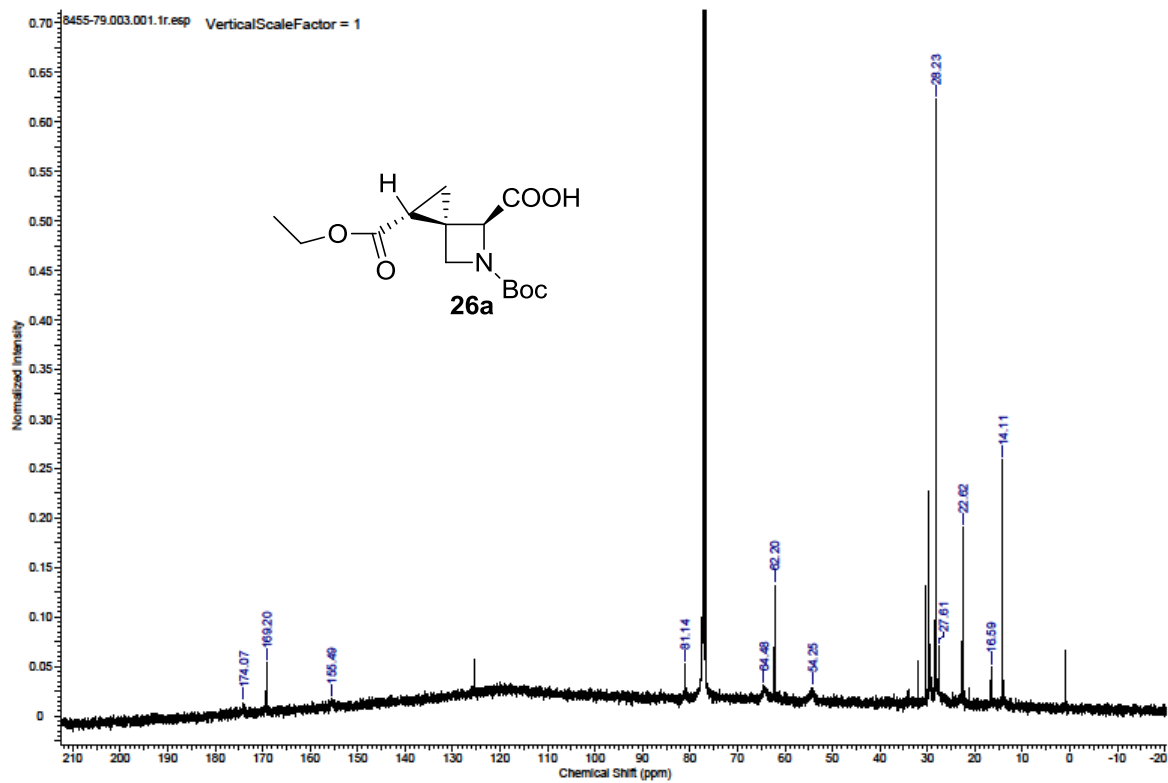

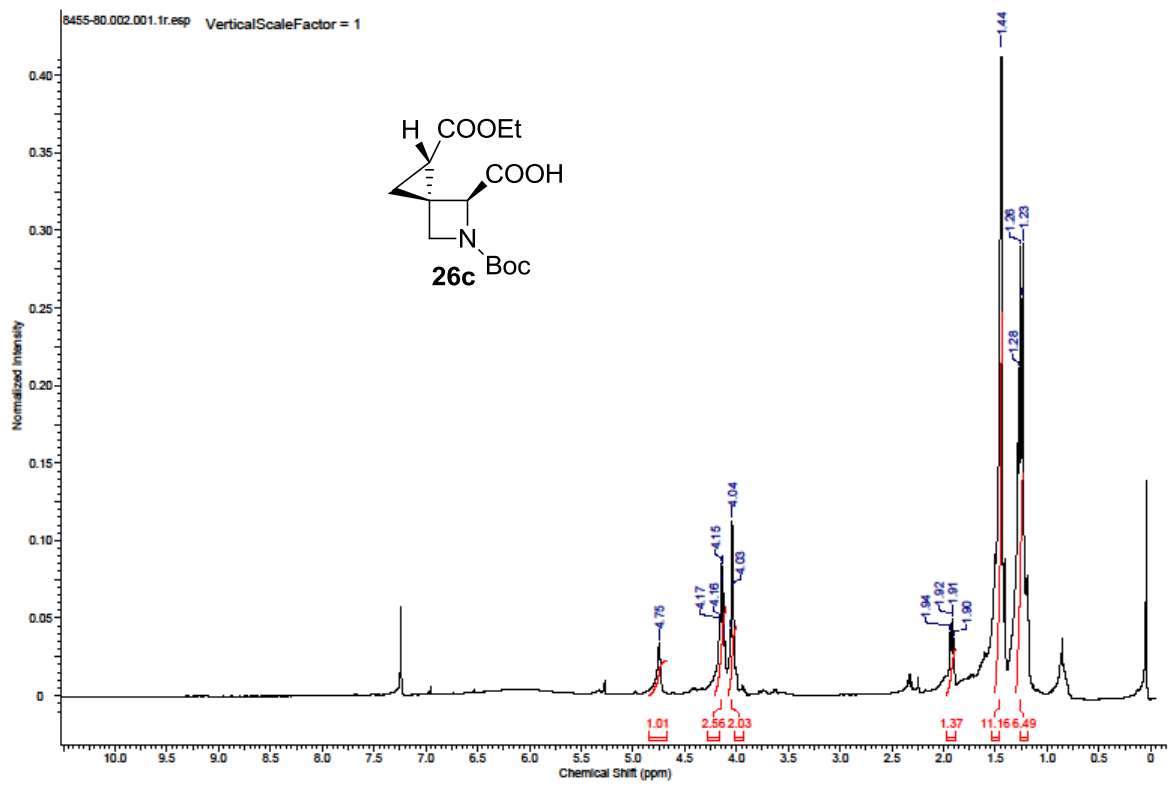

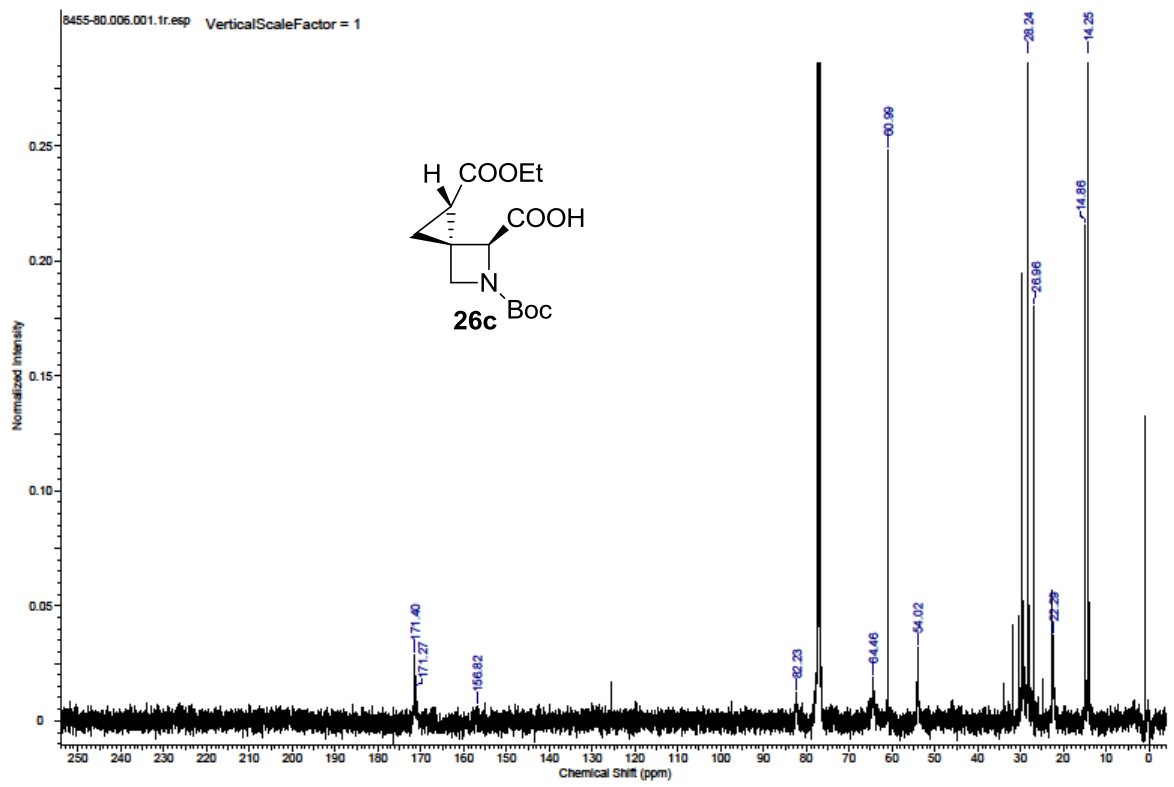

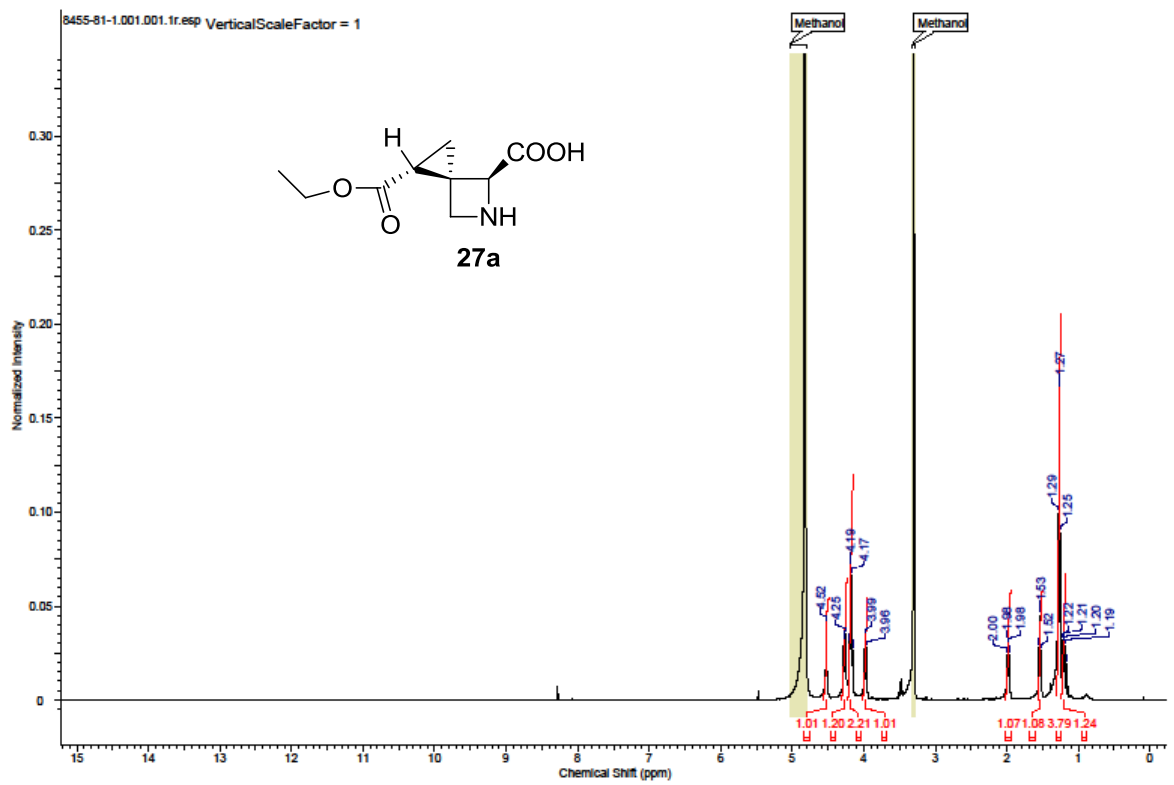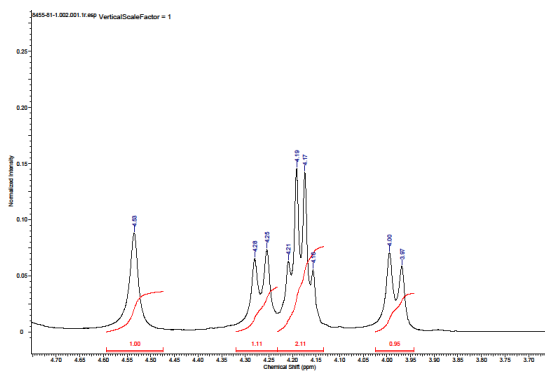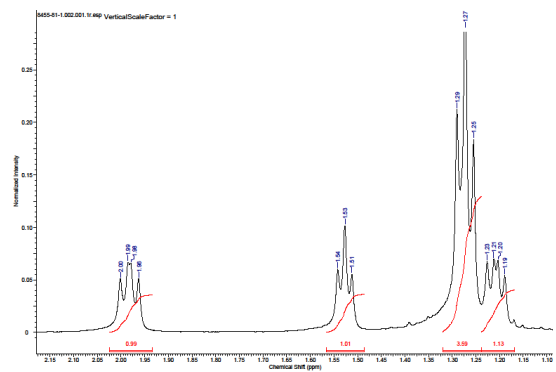

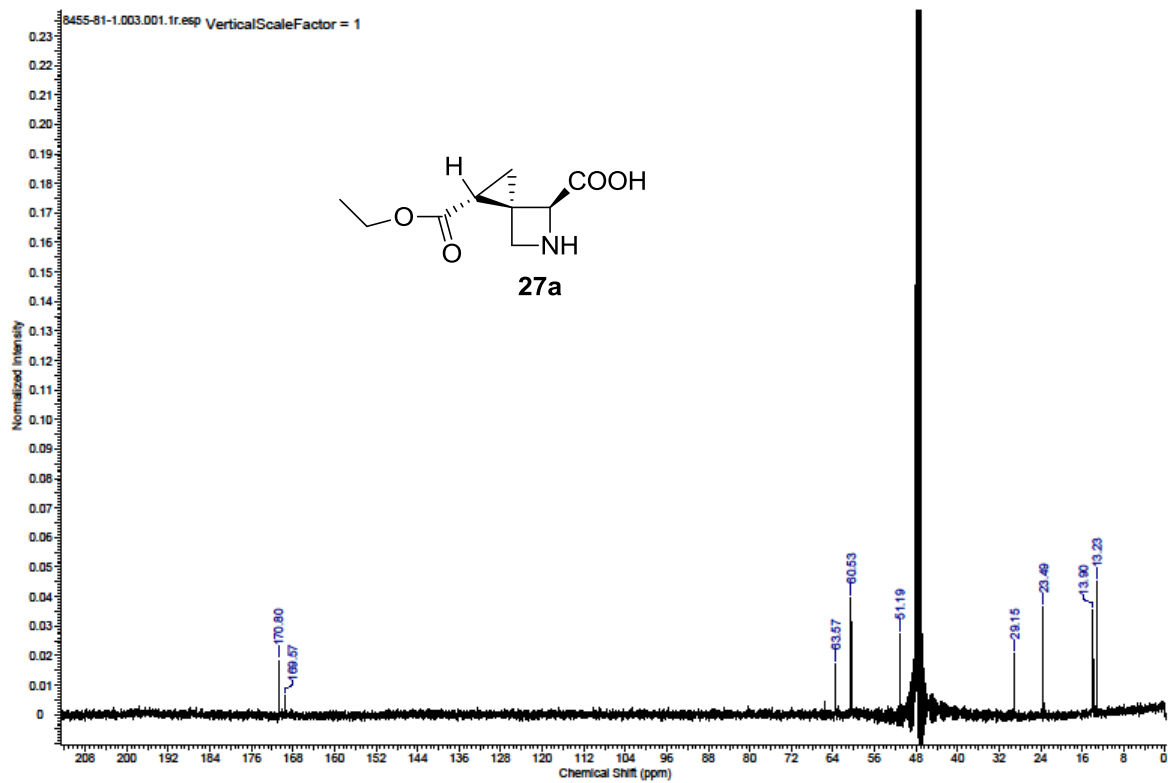

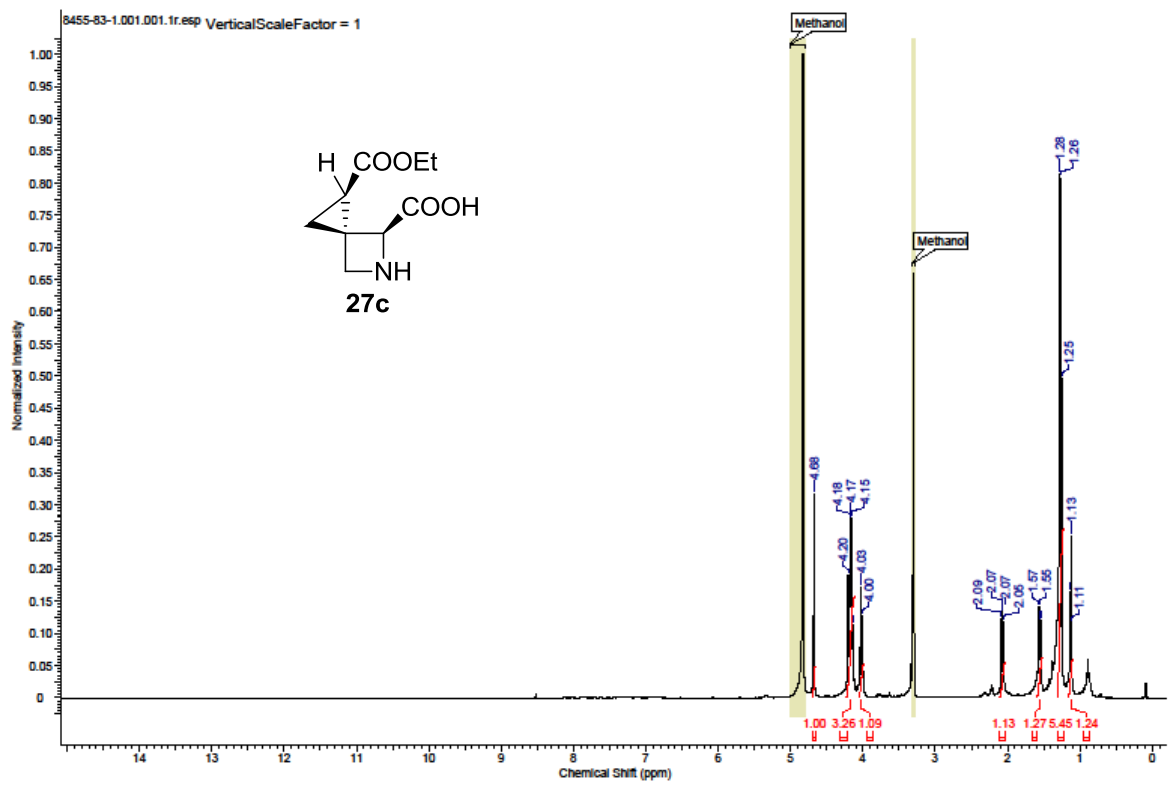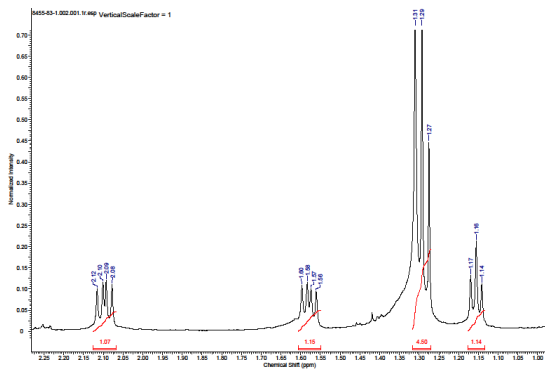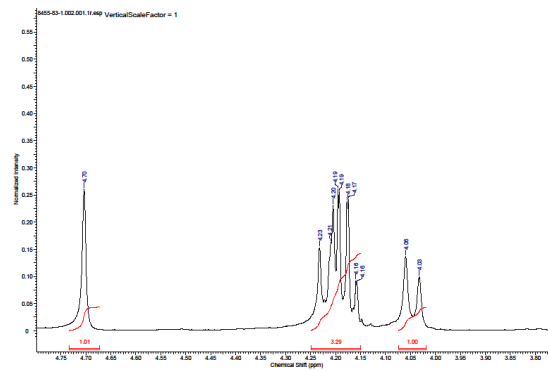

13C  
8455-83-1  
MeOD

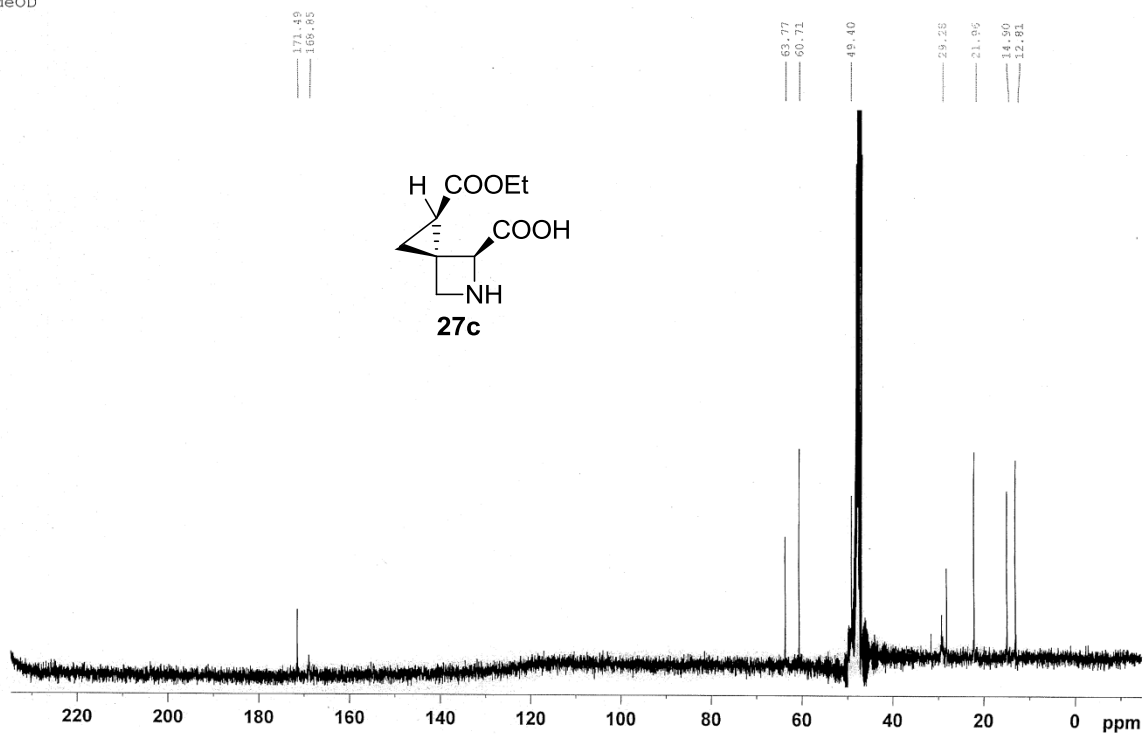

Supplement: Beilstein_J_Org_Chem-10-1114-s004.pdf [file Beilstein_J_Org_Chem-10-1114-s004.pdf]
