# Supplementary material for: Stereocontrolled synthesis of 5-azaspiro[2.3]hexane derivatives as conformationally “frozen” analogues of L-glutamic acid
Source: publisher site journal article supplement (doi:10.3762/bjoc.10.110), 2014-05-14
Supplement: Additional file 3 [file 1860-5397-10-110-S3.pdf]

**Supporting Information File 3**  
for  
**Stereocontrolled synthesis of 5-azaspiro[2.3]hexane  
derivatives as conformationally “frozen” analogues  
of L-glutamic acid**

Beatrice Bechi<sup>1,2</sup>, David Amantini<sup>3,4</sup>, Cristina Tintori<sup>1</sup>, Maurizio Botta\*<sup>1</sup> and Romano di Fabio\*<sup>3,5</sup>

Address: <sup>1</sup>Università degli Studi di Siena, Dipartimento Farmaco Chimico Tecnologico, Via A. Moro 2, 53100, Siena, Italy; <sup>2</sup>Present address: Manchester Institute of Biotechnology, School of Chemistry, University of Manchester, Oxford Road, Manchester, M13 9PL, UK, <sup>3</sup>Neurosciences Centre of Excellence for Drug Discovery, GlaxoSmithKline Medicines Research Centre, Via A. Fleming 4, 37135, Verona, Italy, <sup>4</sup>Present address: Galapagos SASU, 102 avenue Gaston Roussel, 93230 Romainville, France and <sup>5</sup>Present address: Drug Design and Discovery, Aptuit S.r.l., Via A. Fleming 4, 37135 Verona, Italy

Email: Maurizio Botta - botta.maurizio@gmail.com, Romano di Fabio - romano.difabio@aptuit.com

\* Corresponding author

**Gaussian Input Files for QM calculations for  
compounds 20a, 20b, 20c and 20d**

Compound RRS (20a)

|    |          |          |          |
|----|----------|----------|----------|
| C  | -1.46780 | -0.35790 | -3.98230 |
| C  | -1.50370 | -1.69950 | -3.28910 |
| N  | -0.04870 | -1.68220 | -3.40000 |
| C  | 0.04410  | -0.37160 | -4.04740 |
| C  | -2.39130 | 0.84220  | -3.85560 |
| C  | 0.71790  | 0.66130  | -3.13440 |
| O  | 0.11810  | 0.59270  | -1.85330 |
| C  | -2.37800 | 0.01860  | -5.12640 |
| C  | -3.59270 | 0.73620  | -2.96070 |
| O  | -4.74260 | 0.87780  | -3.38360 |
| O  | -3.25470 | 0.50260  | -1.68250 |
| C  | -4.24860 | 0.34160  | -0.68060 |
| C  | -4.64050 | -1.13530 | -0.55260 |
| H  | -1.95220 | 1.83430  | -3.93720 |
| C  | 0.91030  | -2.38710 | -2.68710 |
| O  | 0.29290  | -3.30290 | -1.90190 |
| O  | 2.12560  | -2.19630 | -2.75030 |
| C  | 0.95440  | -4.14770 | -0.95190 |
| C  | 1.89320  | -5.15050 | -1.65300 |
| C  | 1.69260  | -3.33380 | 0.13320  |
| C  | -0.19710 | -4.92020 | -0.28730 |
| Si | 0.14940  | 1.78340  | -0.64720 |
| C  | -0.83480 | 3.24430  | -1.36980 |
| C  | -0.76400 | 0.91480  | 0.77130  |
| C  | 1.97410  | 2.15380  | -0.12570 |
| C  | 2.74000  | 2.91910  | -1.22120 |
| C  | 1.97960  | 3.00230  | 1.15900  |
| C  | 2.68230  | 0.81220  | 0.14550  |
| C  | -2.12640 | 3.53820  | -0.87880 |
| C  | -2.88620 | 4.59460  | -1.41800 |
| C  | -2.36090 | 5.37480  | -2.46390 |
| C  | -1.07850 | 5.09250  | -2.96850 |
| C  | -0.32500 | 4.03350  | -2.42510 |
| C  | -1.20150 | 1.63280  | 1.90530  |
| C  | -1.87590 | 0.97910  | 2.95540  |
| C  | -2.11330 | -0.40660 | 2.88420  |
| C  | -1.67370 | -1.13570 | 1.76360  |
| C  | -1.00350 | -0.47580 | 0.71510  |
| H  | -1.85920 | -1.68130 | -2.25820 |
| H  | -1.97820 | -2.50220 | -3.85450 |
| H  | 0.45340  | -0.41790 | -5.05770 |
| H  | 1.78840  | 0.47290  | -3.05310 |
| H  | 0.60740  | 1.65950  | -3.55530 |
| H  | -1.92310 | 0.46920  | -6.00580 |

|   |          |          |          |
|---|----------|----------|----------|
| H | -3.83620 | 0.69130  | 0.26600  |
| H | -5.12350 | 0.96060  | -0.88490 |
| H | -5.36860 | -1.27210 | 0.24670  |
| H | -5.08470 | -1.50990 | -1.47500 |
| H | -3.77270 | -1.75290 | -0.32120 |
| H | 2.29860  | -5.87050 | -0.94130 |
| H | 1.36790  | -5.71400 | -2.42480 |
| H | 2.74330  | -4.65820 | -2.12480 |
| H | 1.02820  | -2.61960 | 0.61920  |
| H | 2.53790  | -2.77550 | -0.26830 |
| H | 2.08840  | -3.98840 | 0.91020  |
| H | 0.17250  | -5.61380 | 0.46880  |
| H | -0.89860 | -4.24440 | 0.20370  |
| H | -0.76100 | -5.50220 | -1.01730 |
| H | 3.79070  | 3.04130  | -0.95610 |
| H | 2.70920  | 2.40630  | -2.18100 |
| H | 2.33470  | 3.92050  | -1.36410 |
| H | 2.99420  | 3.26020  | 1.46440  |
| H | 1.42990  | 3.93450  | 1.02070  |
| H | 1.51780  | 2.47120  | 1.99180  |
| H | 3.71470  | 0.95840  | 0.46440  |
| H | 2.17470  | 0.24590  | 0.92790  |
| H | 2.69920  | 0.18270  | -0.74530 |
| H | -2.54980 | 2.93890  | -0.08590 |
| H | -3.87410 | 4.80340  | -1.03070 |
| H | -2.94200 | 6.18600  | -2.88080 |
| H | -0.67280 | 5.68640  | -3.77620 |
| H | 0.65170  | 3.82560  | -2.83490 |
| H | -1.01980 | 2.69720  | 1.96580  |
| H | -2.20970 | 1.54130  | 3.81680  |
| H | -2.63010 | -0.91020 | 3.68950  |
| H | -1.85260 | -2.20050 | 1.70540  |
| H | -0.67360 | -1.04130 | -0.14490 |

Compound SRS (**20b**)

|   |          |          |          |
|---|----------|----------|----------|
| C | -1.27360 | -1.04720 | -1.01930 |
| C | 0.09100  | -1.56730 | -0.63450 |
| N | 0.53210  | -1.05460 | -1.92390 |
| C | -0.73900 | -0.45730 | -2.31690 |
| C | -2.46070 | -0.67670 | -0.14140 |
| C | -0.59530 | 1.07040  | -2.35150 |
| O | -0.27400 | 1.53850  | -1.05400 |

|    |          |          |          |
|----|----------|----------|----------|
| C  | -2.49090 | -1.94070 | -0.97540 |
| C  | -3.33920 | 0.47530  | -0.55470 |
| O  | -3.90270 | 0.53350  | -1.65150 |
| O  | -3.40440 | 1.42030  | 0.39260  |
| C  | -4.14190 | 2.60680  | 0.14710  |
| C  | -4.07860 | 3.50900  | 1.38170  |
| H  | -2.29750 | -0.78480 | 0.92890  |
| C  | 1.75970  | -1.08670 | -2.56220 |
| O  | 2.66390  | -1.68690 | -1.75190 |
| O  | 1.98390  | -0.63490 | -3.68550 |
| C  | 4.04920  | -1.87530 | -2.06940 |
| C  | 4.22820  | -2.81070 | -3.28310 |
| C  | 4.78110  | -0.53130 | -2.26960 |
| C  | 4.62170  | -2.56670 | -0.82080 |
| Si | 0.31070  | 3.08460  | -0.67380 |
| C  | -0.66760 | 4.28210  | -1.78390 |
| C  | -0.13510 | 3.24990  | 1.16230  |
| C  | 2.23510  | 3.12090  | -0.86170 |
| C  | 2.67930  | 2.86110  | -2.31250 |
| C  | 2.76890  | 4.49460  | -0.41720 |
| C  | 2.82920  | 2.02190  | 0.03960  |
| C  | -0.46260 | 4.32910  | -3.18110 |
| C  | -1.20740 | 5.20630  | -3.99390 |
| C  | -2.17620 | 6.04780  | -3.41730 |
| C  | -2.39970 | 6.00580  | -2.02910 |
| C  | -1.65070 | 5.12700  | -1.22240 |
| C  | -0.06300 | 4.49760  | 1.81900  |
| C  | -0.38900 | 4.61270  | 3.18480  |
| C  | -0.78450 | 3.47390  | 3.91150  |
| C  | -0.84840 | 2.22200  | 3.27150  |
| C  | -0.52090 | 2.11320  | 1.90570  |
| H  | 0.55290  | -1.05740 | 0.21220  |
| H  | 0.16870  | -2.65080 | -0.53580 |
| H  | -1.15320 | -0.89370 | -3.22720 |
| H  | 0.14850  | 1.38100  | -3.08370 |
| H  | -1.53240 | 1.53270  | -2.66350 |
| H  | -3.12640 | -1.96710 | -1.85880 |
| H  | -2.40750 | -2.88520 | -0.44200 |
| H  | -3.72930 | 3.12560  | -0.71930 |
| H  | -5.17940 | 2.35930  | -0.08210 |
| H  | -4.63810 | 4.42960  | 1.21620  |
| H  | -4.50190 | 3.01230  | 2.25480  |
| H  | -3.05090 | 3.78330  | 1.61750  |
| H  | 5.28030  | -3.05090 | -3.44010 |
| H  | 3.69570  | -3.75170 | -3.14170 |
| H  | 3.86540  | -2.36160 | -4.20730 |
| H  | 5.85340  | -0.68480 | -2.39470 |
| H  | 4.43370  | 0.00390  | -3.15290 |

|   |          |          |          |
|---|----------|----------|----------|
| H | 4.64510  | 0.12640  | -1.41150 |
| H | 5.68690  | -2.77210 | -0.93230 |
| H | 4.49940  | -1.94720 | 0.06860  |
| H | 4.12370  | -3.51770 | -0.62770 |
| H | 3.76600  | 2.81120  | -2.38880 |
| H | 2.29200  | 1.91730  | -2.69080 |
| H | 2.35420  | 3.65540  | -2.98260 |
| H | 3.85110  | 4.56060  | -0.53350 |
| H | 2.32450  | 5.30040  | -1.00340 |
| H | 2.54420  | 4.69140  | 0.63130  |
| H | 3.91800  | 2.00410  | -0.01190 |
| H | 2.55630  | 2.17230  | 1.08500  |
| H | 2.46640  | 1.03420  | -0.24920 |
| H | 0.26470  | 3.67990  | -3.64400 |
| H | -1.03750 | 5.23000  | -5.06180 |
| H | -2.75020 | 6.72070  | -4.03950 |
| H | -3.14790 | 6.64590  | -1.58190 |
| H | -1.84240 | 5.09940  | -0.15960 |
| H | 0.24100  | 5.37570  | 1.26570  |
| H | -0.33510 | 5.57520  | 3.67480  |
| H | -1.03590 | 3.56010  | 4.95970  |
| H | -1.14870 | 1.34430  | 3.82710  |
| H | -0.57040 | 1.14850  | 1.42030  |

Compound SSS (**20c**)

|   |          |          |          |
|---|----------|----------|----------|
| C | -0.26130 | -1.52930 | 2.12210  |
| C | -1.05200 | -2.72020 | 1.63000  |
| N | -0.43900 | -2.46380 | 0.33580  |
| C | 0.34890  | -1.30070 | 0.75380  |
| C | -0.72770 | -0.42750 | 3.06040  |
| C | 1.85990  | -1.55120 | 0.66400  |
| O | 2.18610  | -2.79640 | 1.25300  |
| C | 0.39150  | -1.36280 | 3.47340  |
| C | -2.06480 | -0.56560 | 3.74110  |
| O | -2.43590 | -1.60120 | 4.30140  |
| O | -2.78920 | 0.55930  | 3.64640  |
| C | -4.08390 | 0.60990  | 4.22530  |
| C | -4.69330 | 1.99140  | 3.97440  |
| H | -0.44380 | 0.58460  | 2.77920  |
| C | -0.42800 | -3.24870 | -0.80690 |
| O | 0.40020  | -2.69760 | -1.72430 |
| O | -1.07560 | -4.28590 | -0.95310 |

|    |          |          |          |
|----|----------|----------|----------|
| C  | 0.77010  | -3.30420 | -2.96820 |
| C  | -0.43750 | -3.41440 | -3.92080 |
| C  | 1.79120  | -2.32030 | -3.56400 |
| C  | 1.46260  | -4.66750 | -2.75760 |
| Si | 3.69240  | -3.57360 | 1.14050  |
| C  | 3.20990  | -5.37610 | 0.79760  |
| C  | 4.63110  | -2.76990 | -0.31080 |
| C  | 4.56630  | -3.41820 | 2.85290  |
| C  | 3.66700  | -4.06830 | 3.92100  |
| C  | 5.92790  | -4.13470 | 2.81590  |
| C  | 4.78030  | -1.93790 | 3.21870  |
| C  | 1.85560  | -5.77260 | 0.84200  |
| C  | 1.48510  | -7.10630 | 0.58110  |
| C  | 2.47200  | -8.06310 | 0.27890  |
| C  | 3.82680  | -7.68330 | 0.24090  |
| C  | 4.19080  | -6.34730 | 0.50110  |
| C  | 5.00310  | -1.40680 | -0.28300 |
| C  | 5.68490  | -0.81860 | -1.36640 |
| C  | 6.00710  | -1.59090 | -2.49720 |
| C  | 5.64540  | -2.94960 | -2.54030 |
| C  | 4.96320  | -3.53110 | -1.45360 |
| H  | -0.76230 | -3.67570 | 2.06940  |
| H  | -2.13600 | -2.60020 | 1.62590  |
| H  | 0.02420  | -0.37660 | 0.27300  |
| H  | 2.19390  | -1.51970 | -0.37290 |
| H  | 2.40260  | -0.76010 | 1.18220  |
| H  | 0.18460  | -2.12430 | 4.22310  |
| H  | 1.39640  | -0.94860 | 3.50570  |
| H  | -4.71710 | -0.16420 | 3.78920  |
| H  | -4.02010 | 0.41690  | 5.29720  |
| H  | -5.69040 | 2.05780  | 4.40980  |
| H  | -4.08270 | 2.77760  | 4.41890  |
| H  | -4.78160 | 2.19460  | 2.90700  |
| H  | -0.12740 | -3.76170 | -4.90690 |
| H  | -1.18570 | -4.11840 | -3.55730 |
| H  | -0.92850 | -2.44980 | -4.05310 |
| H  | 2.16420  | -2.66760 | -4.52800 |
| H  | 1.35220  | -1.33390 | -3.71870 |
| H  | 2.65290  | -2.19390 | -2.90730 |
| H  | 1.86850  | -5.05110 | -3.69390 |
| H  | 2.28850  | -4.58700 | -2.05150 |
| H  | 0.77920  | -5.42520 | -2.37490 |
| H  | 4.11040  | -4.00370 | 4.91510  |
| H  | 2.69040  | -3.58340 | 3.96270  |
| H  | 3.49430  | -5.12410 | 3.70740  |
| H  | 6.46140  | -4.02810 | 3.76100  |
| H  | 5.81310  | -5.20240 | 2.62800  |
| H  | 6.56700  | -3.73090 | 2.02920  |

|   |         |          |          |
|---|---------|----------|----------|
| H | 5.16440 | -1.83060 | 4.23360  |
| H | 5.50210 | -1.46150 | 2.55640  |
| H | 3.84930 | -1.37320 | 3.16070  |
| H | 1.09190 | -5.04490 | 1.07660  |
| H | 0.44310 | -7.39380 | 0.61330  |
| H | 2.19030 | -9.08760 | 0.07830  |
| H | 4.58770 | -8.41640 | 0.01070  |
| H | 5.23300 | -6.06120 | 0.46550  |
| H | 4.75230 | -0.79660 | 0.57180  |
| H | 5.95830 | 0.22710  | -1.33030 |
| H | 6.52910 | -1.14160 | -3.33090 |
| H | 5.88800 | -3.54680 | -3.40860 |
| H | 4.68580 | -4.57370 | -1.50730 |

Compound RSS (20d)

|    |          |          |          |
|----|----------|----------|----------|
| C  | -4.50160 | 0.59690  | 0.72220  |
| C  | -5.18370 | -0.62950 | 0.17540  |
| N  | -3.93680 | -1.33330 | 0.45340  |
| C  | -3.23360 | -0.17940 | 1.01150  |
| C  | -4.59520 | 2.01040  | 0.17430  |
| C  | -2.94810 | -0.34110 | 2.50400  |
| O  | -2.04530 | -1.40650 | 2.73020  |
| C  | -5.14390 | 1.68190  | 1.55380  |
| C  | -3.32130 | 2.81190  | 0.04470  |
| O  | -2.88910 | 3.16160  | -1.05550 |
| O  | -2.71570 | 3.05440  | 1.22070  |
| C  | -1.47590 | 3.73990  | 1.25410  |
| C  | -1.00160 | 3.82050  | 2.70680  |
| H  | -5.34940 | 2.20930  | -0.58400 |
| C  | -3.44020 | -2.44710 | -0.20800 |
| O  | -2.09320 | -2.51340 | -0.05680 |
| O  | -4.12720 | -3.23250 | -0.86280 |
| C  | -1.24890 | -3.49140 | -0.68200 |
| C  | -1.57730 | -4.92000 | -0.20080 |
| C  | -1.29980 | -3.38270 | -2.22080 |
| C  | 0.17060  | -3.12630 | -0.21720 |
| Si | -0.72040 | -1.31190 | 3.79070  |
| C  | 0.05950  | -3.02780 | 3.67560  |
| C  | 0.39250  | 0.01920  | 3.01880  |
| C  | -1.34890 | -0.96310 | 5.58750  |
| C  | -1.80390 | 0.50140  | 5.74600  |
| C  | -2.54090 | -1.89270 | 5.88570  |

|   |          |          |          |
|---|----------|----------|----------|
| C | -0.22820 | -1.26690 | 6.60090  |
| C | 1.45780  | -3.18770 | 3.77510  |
| C | 2.03990  | -4.46880 | 3.70270  |
| C | 1.22330  | -5.60390 | 3.53840  |
| C | -0.17390 | -5.45590 | 3.45080  |
| C | -0.75090 | -4.17240 | 3.52240  |
| C | 0.40930  | 0.17340  | 1.61590  |
| C | 1.24020  | 1.12960  | 1.00050  |
| C | 2.07650  | 1.94180  | 1.78820  |
| C | 2.08340  | 1.78840  | 3.18710  |
| C | 1.25030  | 0.82840  | 3.79560  |
| H | -6.02730 | -0.98980 | 0.76540  |
| H | -5.43790 | -0.57900 | -0.88460 |
| H | -2.37300 | 0.12420  | 0.41410  |
| H | -2.53850 | 0.59270  | 2.89120  |
| H | -3.86240 | -0.53900 | 3.06520  |
| H | -6.22640 | 1.65380  | 1.65790  |
| H | -4.61330 | 2.02510  | 2.43950  |
| H | -0.74060 | 3.21030  | 0.64700  |
| H | -1.59040 | 4.74090  | 0.83610  |
| H | -0.03650 | 4.32300  | 2.77100  |
| H | -1.70980 | 4.37410  | 3.32320  |
| H | -0.88680 | 2.82540  | 3.13660  |
| H | -0.84330 | -5.63680 | -0.57010 |
| H | -1.57540 | -4.98200 | 0.88670  |
| H | -2.55270 | -5.26010 | -0.54760 |
| H | -0.56210 | -4.03880 | -2.68390 |
| H | -2.27130 | -3.66680 | -2.62450 |
| H | -1.08810 | -2.36630 | -2.55450 |
| H | 0.91110  | -3.82140 | -0.61390 |
| H | 0.45470  | -2.12660 | -0.54670 |
| H | 0.25300  | -3.14980 | 0.86890  |
| H | -2.67440 | 0.72630  | 5.13170  |
| H | -2.08290 | 0.71870  | 6.77750  |
| H | -1.01740 | 1.20350  | 5.46980  |
| H | -2.93190 | -1.73410 | 6.89120  |
| H | -3.36140 | -1.72920 | 5.18650  |
| H | -2.25550 | -2.94270 | 5.80810  |
| H | -0.56540 | -1.11380 | 7.62650  |
| H | 0.10780  | -2.30200 | 6.52190  |
| H | 0.64510  | -0.63460 | 6.45170  |
| H | 2.08730  | -2.31740 | 3.90270  |
| H | 3.11320  | -4.58030 | 3.77410  |
| H | 1.66830  | -6.58780 | 3.48230  |
| H | -0.80380 | -6.32610 | 3.32690  |
| H | -1.82420 | -4.05840 | 3.45230  |
| H | -0.22250 | -0.45690 | 1.00710  |
| H | 1.23750  | 1.23680  | -0.07550 |



|   |         |         |         |
|---|---------|---------|---------|
| H | 2.71570 | 2.67750 | 1.32000 |
| H | 2.72950 | 2.40660 | 3.79520 |
| H | 1.27190 | 0.72110 | 4.86880 |
